# Supplementary material for: Cloning and evaluation of reference genes for quantitative real-time PCR analysis in Amorphophallus
Source: PeerJ journal article supplement (doi:10.7717/peerj.3260), 2017-04-26

**A**

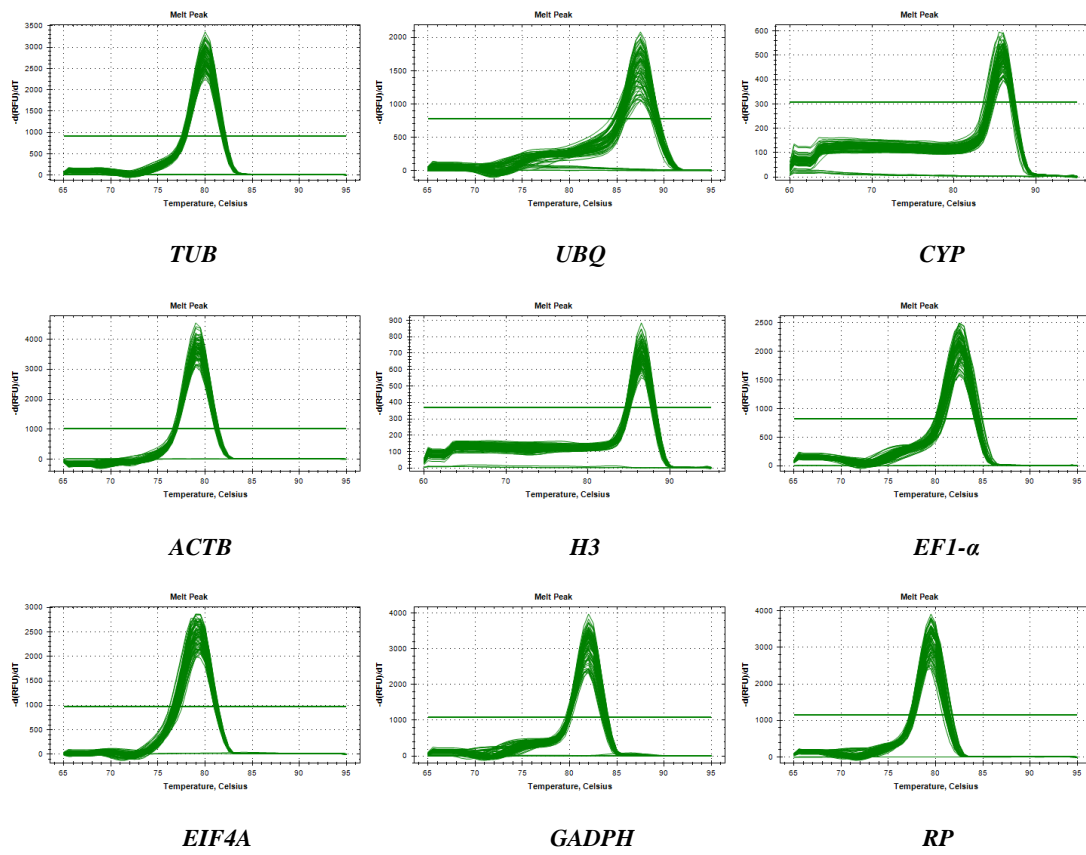

**B**

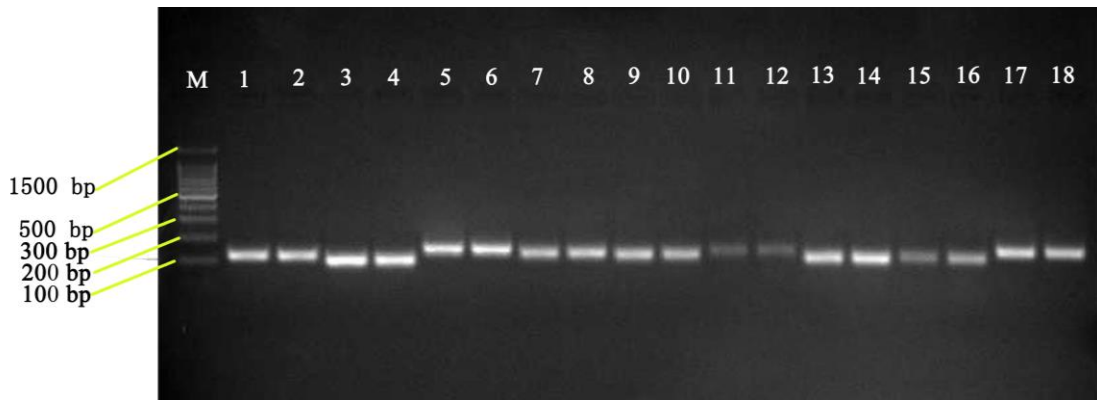

Supplement: S-figue_1.pdf [file S-figue_1.pdf]
